# Supplementary material
Source: PubMed Central journal article supplement (PMC3614155)
Supplement: f-69-00346-sup1.pdf [file f-69-00346-sup1.pdf]

# Organophosphorous acid anhydrolase from *Alteromonas macleodii* – a structural study and functional relationship to prolidases

Andrea Štěpánková, Jarmila Dušková, Tereza Skálová, Jindřich Hašek, Tomáš Kovač, Lars H. Østergaard and Jan Dohnálek

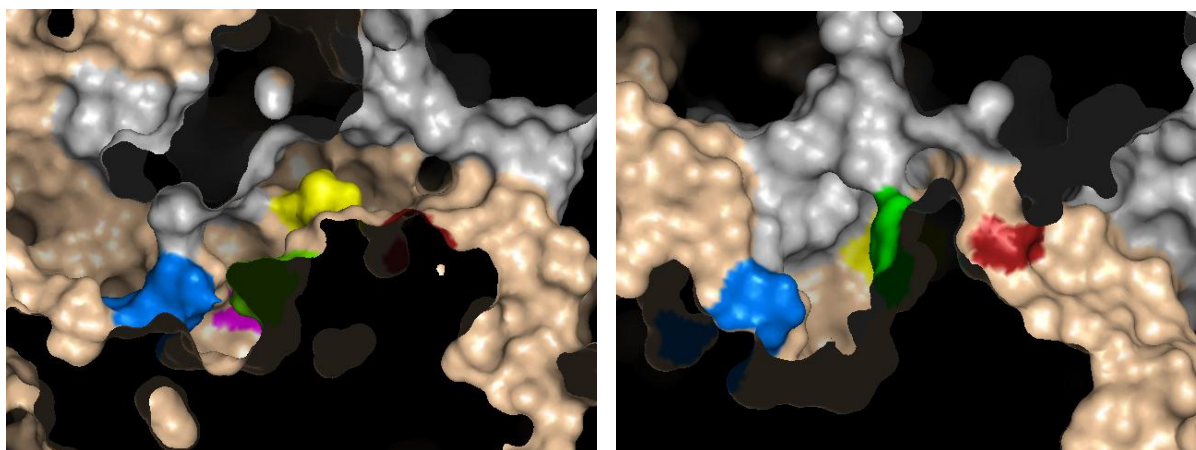

a)

b)

**Figure S1** Cross section of the access routes to the active sites in a) organophosphorous acid anhydrolase from *Alteromonas macleodii*, b) human prolidase. Monomer A of a dimer is colored wheat, monomer B grey. Some key corresponding residues and atoms of the enzymes are colored: Arg370 (amOPAA numbering) blue,  $Mn^{2+}$  magenta, His226 green, Thr213 yellow, Gln229 red. Notice the tight access tunnel in human prolidase from the right opening.
